# Supplementary material for: Variation of the interspecific forest mass-density relationship along gradients of leaf area and global radiation
Source: Copernicus journal article supplement (doi:10.5194/egusphere-2024-2753), 2024-10-09
Supplement: Supplementary file 1 [file egusphere-2024-2753-supplement.pdf]

## Supplementary Material

### Variation of the interspecific forest mass-density relationship along gradients of leaf area and global radiation.

#### Calculation procedure $E_{sglob}$

The values of  $E_{sglob}$  are determined mostly from the monthly means of daily irradiation and the length of the growing season (monthly mean daily minimum air temperature  $T_{min} \geq 0$  °C, <https://www.soda-pro.com/web-services/meteo-data/monthly-means-solar-irradiance-temperature-relative-humidity>). In areas with a sea climate like in Belgium, the Netherlands and the United Kingdom the monthly mean daily mean air temperatures  $T_{mean} \geq 5$  °C are a better measure of the length of the growing season for forests, because the monthly means of daily minimum air temperature hardly fall below 0 °C, even when the monthly means of daily irradiation are very low.

In mountainous areas the temperature measurements are often not representative due to the spatial resolution of 2.5 km at sub-satellite. Therefore, additional data are used:

| Cannell pp           | Location                               | Additional data                                                                                                                                                                                                                                                                                                                                                                                                                                                                                                                                                                                                                                |
|----------------------|----------------------------------------|------------------------------------------------------------------------------------------------------------------------------------------------------------------------------------------------------------------------------------------------------------------------------------------------------------------------------------------------------------------------------------------------------------------------------------------------------------------------------------------------------------------------------------------------------------------------------------------------------------------------------------------------|
| 111, 112 to 115, 116 | Japan, Naeba Mountains                 | Wang, Q., Iio, A., Tenhunen, J. and Kakubari, Y.: Annual and seasonal variations in photosynthetic capacity of <i>Fagus crenata</i> along an elevation gradient in the Naeba Mountains, Japan. <i>Tree Physiol.</i> , 28, 277–285, <a href="https://doi.org/10.1093/treephys/28.2.277">https://doi.org/10.1093/treephys/28.2.277</a> , 2008.                                                                                                                                                                                                                                                                                                   |
| 121                  | Japan                                  | Oshima, Y.: Ecological studies of Sasa Communities I. Productive structure of some of the Sasa communities in Japan. <i>Bot. Mag., Tokyo</i> 74, 199-210, 1961a.<br>Oshima, Y.: Ecological studies of Sasa Communities II. Seasonal variations of productive structure and annual net production in Sasa communities. <i>Bot. Mag., Tokyo</i> 74, 199-210, 1961b.                                                                                                                                                                                                                                                                              |
| 129, 130 185         | Japan, Mount Fuji<br>Japan, Shigayama  | Tadaki, Y., Hattaya, K. and Miyauchi, H.: Studies on the production structure of forest (XII); Primary productivity of <i>Abies veitchii</i> in the natural forests at Mount Fuji. <i>J. Jpn. For. Soc.</i> , 49:421–428, 1967.                                                                                                                                                                                                                                                                                                                                                                                                                |
| 263, 278, 281, 286   | USA, Great Smoky Mountains             | Weather station Mount Leconte, Tennessee, <a href="https://www.climate-charts.com/USA-Stations/TN/USC00406328.html">https://www.climate-charts.com/USA-Stations/TN/USC00406328.html</a><br>The lapse rate $T_{min} = 0.43$ °C per 100 m (also used for Arizona and Oregon), is calculated from Fridley, J.D.: Downscaling climate over complex terrain: high finescale (<1000m) spatial variation of near-ground temperatures in a montane forested landscape, Great Smoky Mountains. <i>J. Appl. Meteorol. Climatol.</i> , 48, 1033-1049, <a href="https://doi.org/10.1175/2008jamc2084.1">https://doi.org/10.1175/2008jamc2084.1</a> , 2009. |
| 270, 292, 311, 334   | USA, Arizona, Santa Catalina Mountains | Weather station Mount Lemmon, Arizona (025733) <a href="https://wrcc.dri.edu/summary/Climsmaz">https://wrcc.dri.edu/summary/Climsmaz</a> . 2012. Available at <a href="http://www.wrcc.dri.edu/summary/Climsmaz.html">www.wrcc.dri.edu/summary/Climsmaz.html</a> (accessed 24 June 2024).                                                                                                                                                                                                                                                                                                                                                      |
| 336, 351             | USA, Oregon                            | Weather stations Oregon: Santiam Pass (357559), Sisters (357857-7), Corvallis State University (352862-2) <a href="https://wrcc.dri.edu/summary/">https://wrcc.dri.edu/summary/</a>                                                                                                                                                                                                                                                                                                                                                                                                                                                            |

This article assumes that the  $E_{sglob}$  calculation method is valid for both evergreen and deciduous species, which have different leaf phenology strategies to cope with  $E_{sglob}$ . An alternative calculation method has been applied to investigate the sensitivity of the results for the leaf phenology of deciduous species.  $E_{adj}$  instead of  $E_{sglob}$  is used for the broadleaved deciduous forests when leaf emergence and/or leaf senescence deviate approximately one month or more from the months used for  $E_{sglob}$  (see Supplementary Table 1). This results in minimal changes in the regression coefficients of Eq. 15 ( $\varepsilon' = 0.17$ ,  $g = 0.15$ ,  $h = 2.97$ ), while the exponent value  $\gamma$  of  $N$  remains 0.47. The  $R^2$  value of the model becomes 0.6743. Given the high similarity of the results and the accuracy of the available data, using only  $E_{sglob}$  is sufficient for the purpose of this article.

**Supplementary Table 1.** Stand data of 132 broadleaved forest communities selected from Cannell (1982). In this article Eq. 14 and 15 are calculated using values of  $E_{sglob}$ . In addition, values of  $E_{adj}$  are notated for deciduous forests when leaf unfolding and/or leaf senescence are expected to deviate approximately one month or more from the estimate of the begin and/or end of the growing season with  $E_{sglob}$  (see the previous text).

| Cannell pp | LAI  | logN (m <sup>-2</sup> ) | logM (g m <sup>-2</sup> ) | $E_{sglob}/E_{adj}$ (GJ m <sup>-2</sup> yr <sup>-1</sup> ) | Cannell pp | LAI | logN (m <sup>-2</sup> ) | logM (g m <sup>-2</sup> ) | $E_{sglob}/E_{adj}$ (GJ m <sup>-2</sup> yr <sup>-1</sup> ) |
|------------|------|-------------------------|---------------------------|------------------------------------------------------------|------------|-----|-------------------------|---------------------------|------------------------------------------------------------|
| 24         | 6.5  | -1.72125                | 4.5307118                 | 2.5980/2.2524                                              | 103        | 5.5 | 1.176091                | 3.64836                   | 5.8663                                                     |
| 24         | 6.4  | -1.79588                | 4.5724069                 | 2.5980/2.2524                                              | 105        | 6   | -0.53805                | 4.2862319                 | 5.6246                                                     |
| 37         | 1.5  | -0.42022                | 3.587711                  | 2.8159                                                     | 106        | 4.3 | -0.90309                | 4.2924776                 | 5.9289                                                     |
| 37         | 1.8  | -0.42022                | 3.7737864                 | 2.8159                                                     | 110        | 8.3 | -0.10696                | 4.5354207                 | 5.8444                                                     |
| 37         | 3.1  | -1                      | 4.2447718                 | 2.8159                                                     | 110        | 8.1 | -0.17822                | 4.577032                  | 5.8444                                                     |
| 38         | 2.4  | 0.460898                | 3.382017                  | 3.2702                                                     | 110        | 6.9 | -0.13686                | 4.5483894                 | 5.8444                                                     |
| 38         | 2.9  | -0.02687                | 3.7307823                 | 3.2702                                                     | 111        | 7.7 | -0.28108                | 4.3100557                 | 4.1459                                                     |
| 38         | 1.6  | -1.30627                | 3.9698816                 | 3.2702                                                     | 111        | 7.6 | -0.66035                | 4.331832                  | 4.1459                                                     |
| 56         | 5.2  | -1.1349                 | 4.2111205                 | 2.6426/2.2970                                              | 111        | 7.8 | -0.54837                | 4.3919931                 | 4.1459                                                     |
| 57         | 4.6  | -1.06854                | 4.4974825                 | 2.5982/2.2526                                              | 112        | 4.5 | -1.42597                | 4.4402792                 | 4.2470                                                     |
| 59         | 5    | -1.4318                 | 4.3338501                 | 2.4878                                                     | 112        | 4.4 | -1.48545                | 4.4874212                 | 3.6134                                                     |
| 67         | 4.4  | -0.85387                | 4.4313638                 | 4.6718                                                     | 112        | 4.9 | -1.62893                | 4.5370631                 | 3.6134                                                     |
| 72         | 6.5  | -0.44129                | 4.1906118                 | 2.2526/1.9286                                              | 112        | 5.4 | -1.16749                | 4.5410798                 | 3.6134                                                     |
| 72         | 6.7  | -0.92445                | 4.2013971                 | 2.2526/1.9286                                              | 113        | 5.2 | -0.97881                | 4.4824448                 | 3.6134                                                     |
| 72         | 5.9  | -1.61439                | 4.4383841                 | 2.2526/1.9286                                              | 113        | 3.3 | -1.05799                | 4.3130231                 | 2.9141                                                     |
| 90         | 3.2  | -1.07779                | 4.3847117                 | 6.1104                                                     | 113        | 3.2 | -1.22915                | 4.1798389                 | 2.9141                                                     |
| 92         | 4.8  | -0.20761                | 4.3541084                 | 6.5410                                                     | 113        | 3.3 | -1.44733                | 4.2345173                 | 2.9141                                                     |
| 92         | 5.4  | -0.19382                | 4.5228353                 | 6.5410                                                     | 114        | 5.8 | -1.43533                | 4.5240064                 | 3.6134                                                     |
| 97         | 4.1  | -1.30103                | 4.0681859                 | 3.2227                                                     | 114        | 5.5 | -1.5391                 | 4.5430742                 | 3.6134                                                     |
| 97         | 5.2  | -1.22185                | 4.155336                  | 3.2227                                                     | 114        | 5.6 | -1.49349                | 4.5582284                 | 3.6134                                                     |
| 97         | 3.7  | -1.56864                | 3.9571282                 | 3.2227                                                     | 114        | 4.6 | -1.3279                 | 4.4966529                 | 3.6134                                                     |
| 98         | 2.9  | 0.277701                | 3.2648178                 | 3.2225                                                     | 114        | 6.2 | -1.44855                | 4.5625308                 | 3.6134                                                     |
| 99         | 6.2  | -0.35655                | 4.2659964                 | 5.7514                                                     | 114        | 5.3 | -1.39794                | 4.4935974                 | 3.6134                                                     |
| 99         | 5.6  | -0.33724                | 4.1792645                 | 5.7514                                                     | 115        | 4.8 | -0.99311                | 4.408918                  | 3.6134                                                     |
| 99         | 3.7  | -0.04576                | 4.0580462                 | 5.7514                                                     | 115        | 4.2 | -1.01818                | 4.3905819                 | 2.9141                                                     |
| 99         | 6.8  | -0.36653                | 4.2469907                 | 5.7514                                                     | 115        | 4   | -1.1945                 | 4.31618                   | 2.9141                                                     |
| 101        | 6.6  | 0.146128                | 4.3956758                 | 5.7514                                                     | 115        | 3.2 | -1.37469                | 4.184407                  | 2.9141                                                     |
| 101        | 6.4  | -0.36653                | 4.2662317                 | 5.7514                                                     | 115        | 4.3 | -1.08619                | 4.331832                  | 2.9141                                                     |
| 101        | 5.4  | -0.33724                | 4.1766699                 | 5.7514                                                     | 116        | 4.5 | -1.10513                | 4.465977                  | 3.6281                                                     |
| 101        | 4.1  | -0.04576                | 4.0569049                 | 5.7514                                                     | 118        | 2.4 | -0.90518                | 4.122544                  | 3.2227                                                     |
| 101        | 5.7  | -0.36653                | 4.2526103                 | 5.7514                                                     | 119        | 7.5 | 0.133539                | 4.358125                  | 5.7514                                                     |
| 101        | 5.5  | -0.25181                | 4.3562171                 | 5.7514                                                     | 119        | 7   | -0.25964                | 4.326131                  | 5.7514                                                     |
| 102        | 10.7 | 0.09691                 | 4.3092042                 | 5.8663                                                     | 119        | 6.8 | 0.193125                | 4.297323                  | 5.7514                                                     |
| 102        | 10.1 | 0.004321                | 4.3193143                 | 5.8663                                                     | 120        | 6.9 | 0.269513                | 4.338058                  | 5.6561                                                     |
| 102        | 9.8  | -0.13077                | 4.3782161                 | 5.8663                                                     | 120        | 9.4 | 0.232996                | 4.423246                  | 5.6561                                                     |
| 102        | 8.5  | -0.11351                | 4.2966652                 | 5.8663                                                     | 120        | 7.7 | 0.176091                | 4.421439                  | 5.6561                                                     |
| 103        | 7.4  | -0.5376                 | 4.3316297                 | 5.8663                                                     | 121        | 5.2 | 2.414973                | 3.276462                  | 4.6003                                                     |
| 103        | 4.4  | -0.50864                | 4.0496056                 | 5.8663                                                     | 121        | 4.7 | 2.58995                 | 2.913814                  | 3.6355                                                     |
| 103        | 4.4  | -0.50169                | 4.0576661                 | 5.8663                                                     | 121        | 4.7 | 2.334454                | 3.217484                  | 4.5568                                                     |
| 103        | 5.2  | 0.139879                | 3.6757783                 | 5.8663                                                     | 121        | 5.3 | 1.439333                | 3.08636                   | 3.2576                                                     |
| 103        | 7.2  | 0.320146                | 3.8221681                 | 5.8663                                                     | 197        | 4.5 | -1.12784                | 4.65782                   | 5.6225                                                     |

**Supplementary Table 1 (continued)**

| Cannell pp | LAI  | logN<br>(m <sup>-2</sup> ) | logM<br>(g m <sup>-2</sup> ) | $E_{sglob}/E_{adj}$<br>(GJ m <sup>-2</sup> yr <sup>-1</sup> ) | Cannell pp | LAI | logN<br>(m <sup>-2</sup> ) | logM<br>(g m <sup>-2</sup> ) | $E_{sglob}/E_{adj}$<br>(GJ m <sup>-2</sup> yr <sup>-1</sup> ) |
|------------|------|----------------------------|------------------------------|---------------------------------------------------------------|------------|-----|----------------------------|------------------------------|---------------------------------------------------------------|
| 197        | 6.3  | -1.22185                   | 4.678609                     | 5.6225                                                        | 260        | 4.4 | -0.66354                   | 4.11727                      | 4.2366/3.6661                                                 |
| 201        | 5.2  | -1.52288                   | 4.429914                     | 2.4878/2.1350                                                 | 263        | 7.4 | -0.73993                   | 4.343802                     | 5.2018/4.3090                                                 |
| 213        | 4.7  | -1.52724                   | 4.353916                     | 2.4151/2.0911                                                 | 269        | 6.6 | -0.79588                   | 4.31492                      | 3.0070                                                        |
| 219        | 2.5  | -0.56384                   | 3.775974                     | 3.9410/3.4658                                                 | 270        | 6.4 | -0.51428                   | 4.097257                     | 5.9021/4.0546                                                 |
| 219        | 3.4  | -0.70553                   | 3.716838                     | 3.9410/3.4658                                                 | 274        | 5   | -0.54638                   | 3.969882                     | 3.4289/3.1313                                                 |
| 222        | 3.1  | -1.34486                   | 3.890421                     | 2.3909/1.8254                                                 | 274        | 4.9 | -0.68194                   | 3.980003                     | 3.4289/3.1313                                                 |
| 224        | 3.4  | -1.61979                   | 4.515211                     | 2.4139                                                        | 274        | 5.5 | -0.72862                   | 4.07664                      | 3.4289/3.1313                                                 |
| 224        | 4.3  | -1.74473                   | 4.49693                      | 2.4139                                                        | 276        | 4.4 | -1.37469                   | 4.421604                     | 3.6641                                                        |
| 224        | 3.2  | -1.49485                   | 4.352183                     | 2.4139                                                        | 278        | 3.5 | -0.58503                   | 3.934498                     | 4.6510/3.6661                                                 |
| 229        | 6.6  | -0.95546                   | 4.246499                     | 2.8682/2.4434                                                 | 281        | 6.3 | -0.67162                   | 4.623249                     | 5.2028/4.3090                                                 |
| 234        | 12.1 | 0.209515                   | 4.842297                     | 5.7838                                                        | 286        | 6.1 | 0.630428                   | 4.032619                     | 4.3421/3.6661                                                 |
| 238        | 6.2  | -0.3019                    | 3.79379                      | 2.4720/2.4288                                                 | 370        | 4.4 | -0.25181                   | 4.469527                     | 5.2109                                                        |
| 238        | 3.5  | -0.60555                   | 3.893762                     | 2.4720/2.4288                                                 | 370        | 9.5 | -0.20761                   | 4.784403                     | 5.2109                                                        |
| 238        | 4.1  | -0.37572                   | 3.804821                     | 2.4720/2.4288                                                 | 370        | 5.8 | -0.02687                   | 4.270213                     | 5.2109                                                        |
| 238        | 1.7  | -0.82391                   | 3.848189                     | 2.4720/2.4288                                                 | 370        | 5.4 | -0.01323                   | 4.384891                     | 5.2109                                                        |
| 238        | 2.8  | -0.8729                    | 3.836957                     | 2.4720/2.4288                                                 | 370        | 3.1 | 0.155336                   | 4.03543                      | 5.2109                                                        |
| 238        | 4.1  | -1.13077                   | 4.082067                     | 2.4720/2.4288                                                 | 370        | 5.7 | 0.127105                   | 4.419956                     | 5.2109                                                        |
| 238        | 5.9  | -0.9914                    | 4.237292                     | 2.4720/2.4288                                                 | 371        | 3   | 0.243038                   | 3.977724                     | 5.2109                                                        |
| 238        | 6.5  | -1.05552                   | 4.201397                     | 2.4720/2.4288                                                 | 371        | 2.8 | 0.198657                   | 4.266232                     | 5.2109                                                        |
| 240        | 4.5  | -1.28483                   | 3.986772                     | 2.6136/2.3695                                                 | 371        | 9.8 | 0.068186                   | 4.727297                     | 5.2109                                                        |
| 240        | 4.5  | -1.27003                   | 4.053846                     | 2.6136/2.3695                                                 | 371        | 3.9 | 0.012837                   | 4.265525                     | 5.2109                                                        |
| 250        | 6.2  | -0.83863                   | 4.699143                     | 4.6510/3.6661                                                 | 371        | 4.7 | 0.029384                   | 4.447933                     | 5.2109                                                        |
| 259        | 5.7  | -0.88941                   | 4.167022                     | 3.3696                                                        | 371        | 4.6 | 0.025306                   | 4.65273                      | 5.2109                                                        |
| 259        | 6.2  | -0.88941                   | 4.200303                     | 3.3696                                                        | 371        | 3.2 | 0.123852                   | 4.2266                       | 5.2109                                                        |
| 259        | 5.5  | -0.61618                   | 3.98945                      | 3.3696                                                        | 372        | 5.2 | 0.049877                   | 4.510143                     | 5.2109                                                        |

**Supplementary Table 2.** Stand data of 67 coniferous forest communities selected from Cannell (1982)

| Cannell pp | LAI | logN<br>(m <sup>-2</sup> ) | logM<br>(g m <sup>-2</sup> ) | E <sub>sglob</sub><br>(GJ m <sup>-2</sup> yr <sup>-1</sup> ) | Cannell pp | LAI | logN<br>(m <sup>-2</sup> ) | logM<br>(g m <sup>-2</sup> ) | E <sub>sglob</sub><br>(GJ m <sup>-2</sup> yr <sup>-1</sup> ) |
|------------|-----|----------------------------|------------------------------|--------------------------------------------------------------|------------|-----|----------------------------|------------------------------|--------------------------------------------------------------|
| 57         | 3.4 | -0.77806                   | 4.111599                     | 2.5982                                                       | 244        | 3.3 | -0.24872                   | 3.539076                     | 2.7271                                                       |
| 73         | 9.4 | -1.09691                   | 4.508126                     | 2.2814                                                       | 244        | 3.9 | -0.26761                   | 3.695482                     | 2.7271                                                       |
| 125        | 5.4 | -1.54061                   | 4.574957                     | 6.0435                                                       | 244        | 1.9 | -0.4389                    | 3.800717                     | 2.7271                                                       |
| 129        | 8.1 | 0.290035                   | 3.838849                     | 4.2145                                                       | 244        | 3.1 | -0.62525                   | 3.997386                     | 2.7271                                                       |
| 129        | 9.7 | -0.01323                   | 4.150756                     | 4.2145                                                       | 244        | 3.6 | -0.72354                   | 4.072617                     | 2.7271                                                       |
| 129        | 8.2 | -0.49771                   | 4.349083                     | 4.2145                                                       | 244        | 2.7 | -1.11919                   | 4.065206                     | 2.7271                                                       |
| 130        | 7.8 | -0.41862                   | 4.202488                     | 4.2145                                                       | 246        | 5   | -0.67572                   | 4.148294                     | 2.4305                                                       |
| 135        | 5.8 | -0.45593                   | 4.149219                     | 5.4134                                                       | 246        | 2.8 | -0.67572                   | 4.056524                     | 2.4305                                                       |
| 135        | 6.3 | -0.88606                   | 4.420286                     | 5.4134                                                       | 246        | 3.8 | -0.67572                   | 4.089905                     | 2.4305                                                       |
| 137        | 5.1 | -0.46852                   | 4.405517                     | 5.1547                                                       | 246        | 4.1 | -0.67572                   | 4.114277                     | 2.4305                                                       |
| 143        | 5.6 | -0.87354                   | 4.34733                      | 4.4461                                                       | 246        | 4.8 | -0.67572                   | 4.120245                     | 2.4305                                                       |
| 143        | 5.4 | -0.8617                    | 4.324077                     | 4.4461                                                       | 292        | 6.4 | -1.12494                   | 4.552474                     | 5.4702                                                       |
| 143        | 5.8 | -0.83476                   | 4.349472                     | 4.4461                                                       | 292        | 6.7 | -0.82102                   | 4.557146                     | 5.4702                                                       |
| 143        | 6   | -0.8274                    | 4.372912                     | 4.4461                                                       | 311        | 2.7 | -0.56864                   | 4.207634                     | 5.4702                                                       |
| 143        | 5.9 | -0.79237                   | 4.369772                     | 4.4461                                                       | 311        | 2.1 | -0.95861                   | 4.397592                     | 5.4702                                                       |
| 144        | 4.7 | -0.87778                   | 4.372728                     | 6.0180                                                       | 311        | 1.7 | -0.89279                   | 4.210586                     | 5.4702                                                       |
| 144        | 5.9 | -0.84345                   | 4.327972                     | 6.0180                                                       | 314        | 3.4 | -0.3019                    | 3.889862                     | 3.3695                                                       |
| 144        | 5.4 | -0.79588                   | 4.393048                     | 6.0180                                                       | 314        | 3.1 | -0.15366                   | 3.913284                     | 3.3695                                                       |
| 144        | 6.6 | -0.54455                   | 4.191171                     | 6.0180                                                       | 314        | 3.8 | -0.81531                   | 4.061452                     | 3.3695                                                       |
| 144        | 5.7 | -0.6073                    | 4.239049                     | 6.0180                                                       | 314        | 4.2 | -0.19246                   | 4                            | 3.3695                                                       |
| 144        | 6.2 | -0.49594                   | 4.312177                     | 6.0180                                                       | 314        | 4.3 | -0.24185                   | 4.01368                      | 3.3695                                                       |
| 146        | 5.1 | -0.19382                   | 4.039811                     | 5.9125                                                       | 315        | 1.9 | -0.18575                   | 3.673942                     | 3.3695                                                       |
| 146        | 5.1 | -0.20066                   | 4.031408                     | 5.9125                                                       | 315        | 2.6 | -0.18575                   | 3.744293                     | 3.3695                                                       |
| 146        | 5.9 | -0.4437                    | 4.106871                     | 5.9125                                                       | 315        | 2.5 | -0.18575                   | 3.739572                     | 3.3695                                                       |
| 147        | 4.1 | -0.87517                   | 4.149835                     | 5.7806                                                       | 315        | 3   | -0.75449                   | 3.864511                     | 3.3695                                                       |
| 147        | 5.3 | -0.70952                   | 4.164353                     | 5.7806                                                       | 315        | 2.9 | -0.4168                    | 3.888179                     | 3.3695                                                       |
| 147        | 5.7 | -0.61618                   | 4.185825                     | 5.7806                                                       | 315        | 2.3 | -0.17522                   | 3.757396                     | 3.3695                                                       |
| 149        | 7.4 | 0.469822                   | 3.897627                     | 5.9333                                                       | 315        | 2.8 | 0.030195                   | 3.741152                     | 3.3695                                                       |
| 167        | 4.2 | -0.93742                   | 4.216166                     | 4.3470                                                       | 334        | 6.7 | -1.14267                   | 4.640978                     | 5.4702                                                       |
| 185        | 6.8 | -0.92118                   | 4.303412                     | 3.6348                                                       | 335        | 6.5 | -1.31158                   | 4.652246                     | 4.4092                                                       |
| 186        | 4.3 | -1.32331                   | 4.650016                     | 6.0708                                                       | 335        | 7.8 | -1.50585                   | 4.937016                     | 4.4092                                                       |
| 232        | 2.8 | -1.22185                   | 4.299071                     | 3.0687                                                       | 336        | 9.6 | -0.99783                   | 4.722634                     | 4.4330                                                       |
| 232        | 3.1 | -1.21896                   | 4.477844                     | 3.0687                                                       | 351        | 4.3 | -1.09474                   | 4.444045                     | 3.7456                                                       |
| 242        | 9.1 | -0.41828                   | 4.033021                     | 2.6152                                                       |            |     |                            |                              |                                                              |
